# Supplementary material
Source: PubMed Central journal article supplement (PMC9608360)
Supplement: NIHMS1843811-supplement-Supplemental_material.pdf [file NIHMS1843811-supplement-Supplemental_material.pdf]

Supplementary Information

**Differential coding of goals and actions in ventral and dorsal corticostriatal circuits during goal-directed behavior**

Hua Tang, Vincent D. Costa, Ramon Bartolo, Bruno B. Averbeck

Supplementary Figures 1-7

Supplementary Tables 1-4

## SUPPLEMENTARY FIGURES

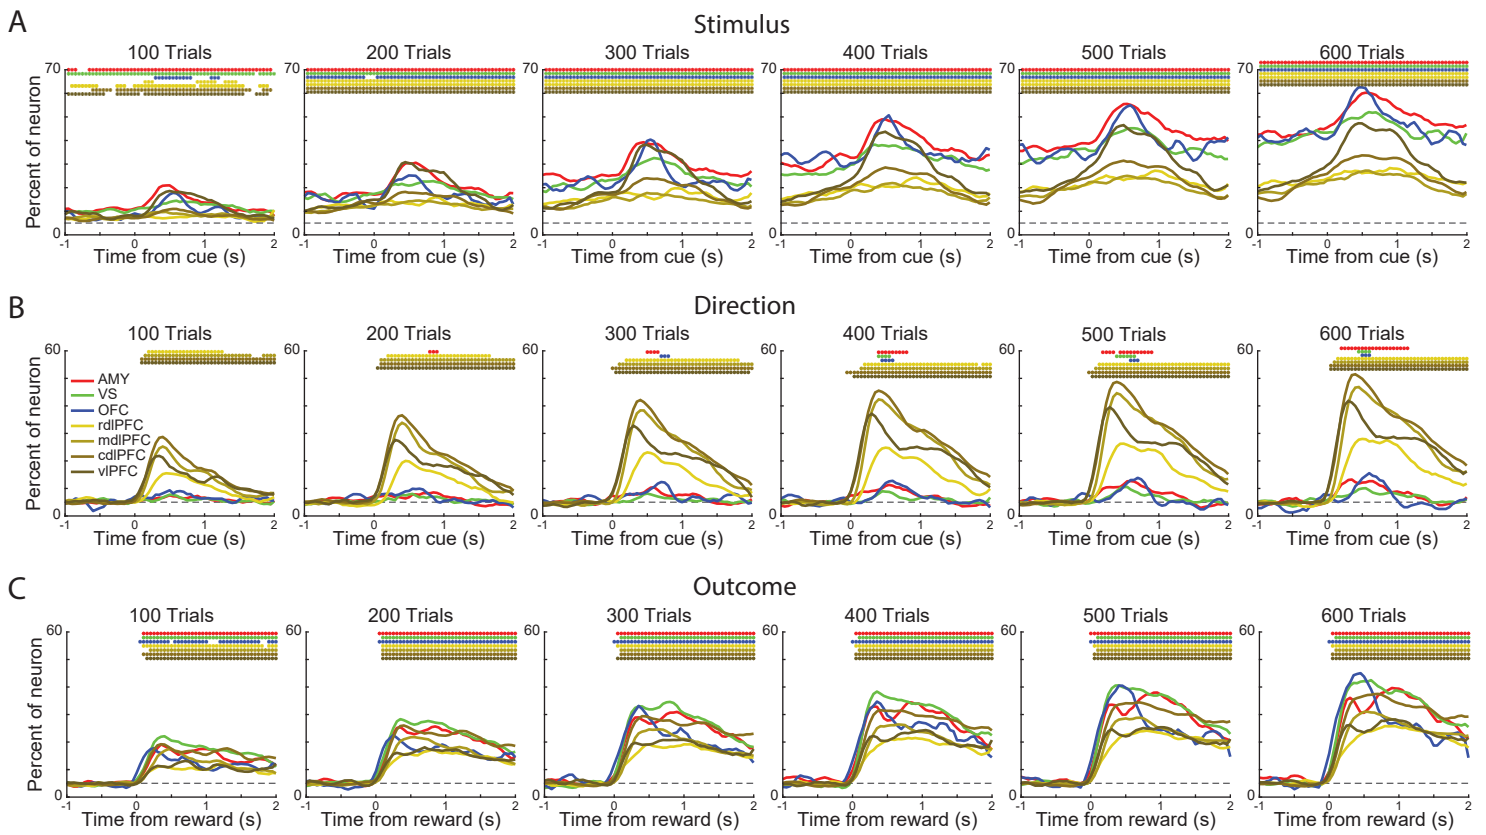

**Figure S1. Population encoding of stimulus identity, direction and outcome, split by the different number of trials used.**

*Related to Figure 4.*

(A-C) Percentage of responsive neurons in each area encoding the Stimulus identity (A), Direction (B) of the chosen option, and the Outcome on the current trial (C). Successive panels represent the different numbers (from 100 to 600) of trials since the start of the session used in this analysis. Conventions are the same as Figure 4.

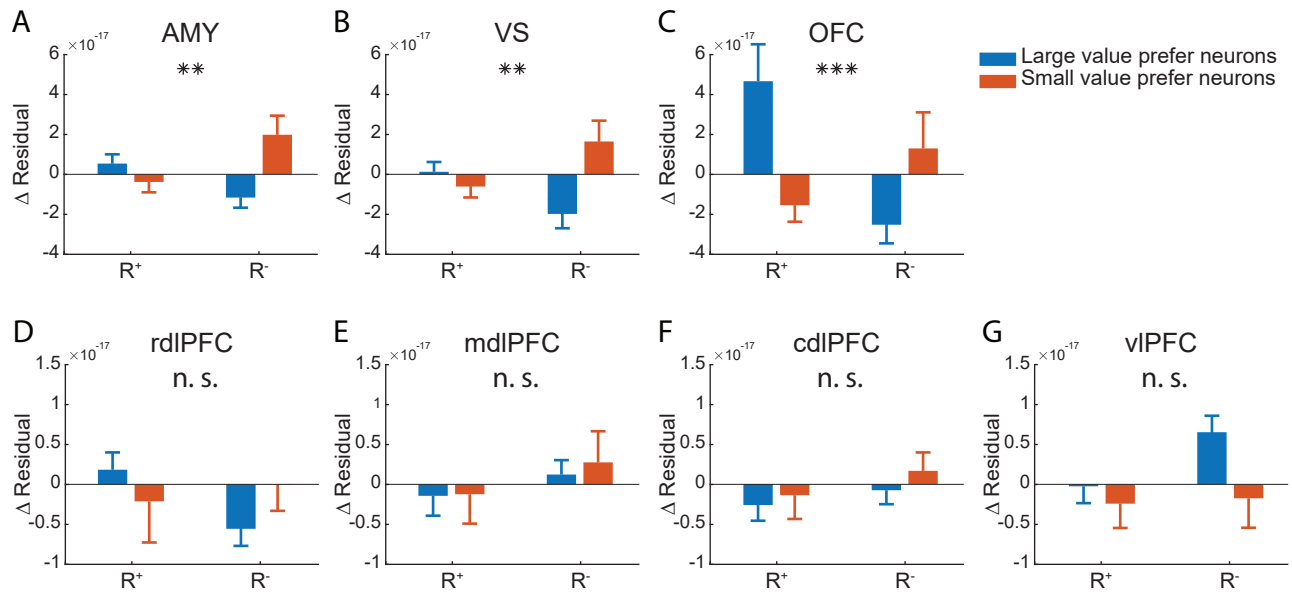

**Figure S2. Hold period value signal is modulated by previous outcomes.** *Related to Figure 5.*

(A-G) The influence of previous trial outcomes on value signal maintained by different groups of neurons during the hold period.  $\Delta$  residual: difference of residual in the IEV-excluded ANOVA model between using the hold period activity on the current and previous trials. Large-/small- value-prefer neurons had higher/lower residuals in trials with a higher reward probability (*a priori* reward).  $R^+/R^-$  indicates rewarded/non-rewarded on the previous trial. Error bars represent SEM. 2-way ANOVA; \*\* $p < 0.01$ , \*\*\* $p < 0.001$ , n. s. - not significant.

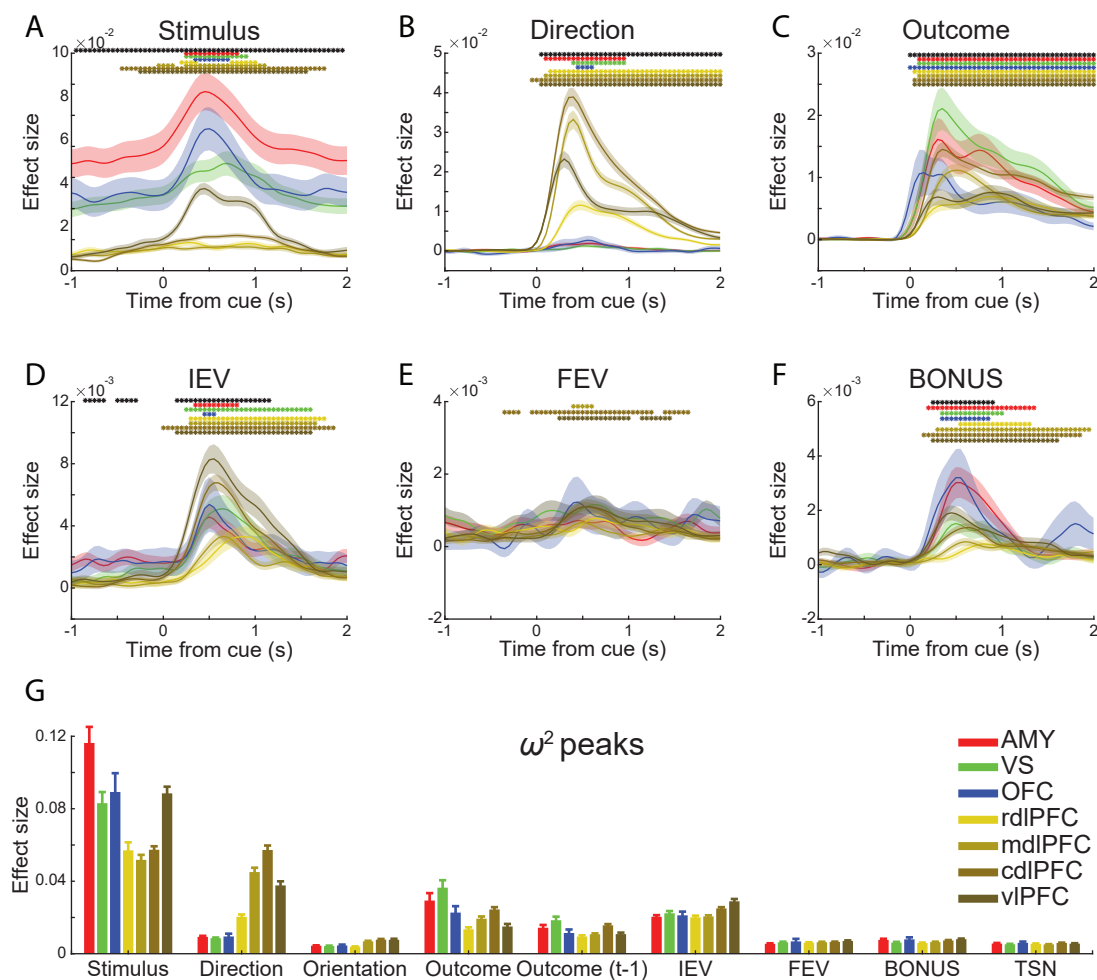

**Figure S3. Population encoding of chosen stimulus, direction, outcome, and POMDP derived value signals, all neurons are included.** *Related to Figures 4 and 5.*

(A-F) Mean effect size ( $\omega^2$ ) for all neurons encoding the chosen Stimulus (A), Direction (B), Outcome (C), IEV (D), FEV (E) and BONUS (F) of the chosen options.

(G) Mean peak value of effect size of all the recorded neurons in the amygdala, VS, OFC, and LPFC regions. Number of neurons used in the effect size analyses is indicated in Table S1. Conventions are the same as Figure 5.

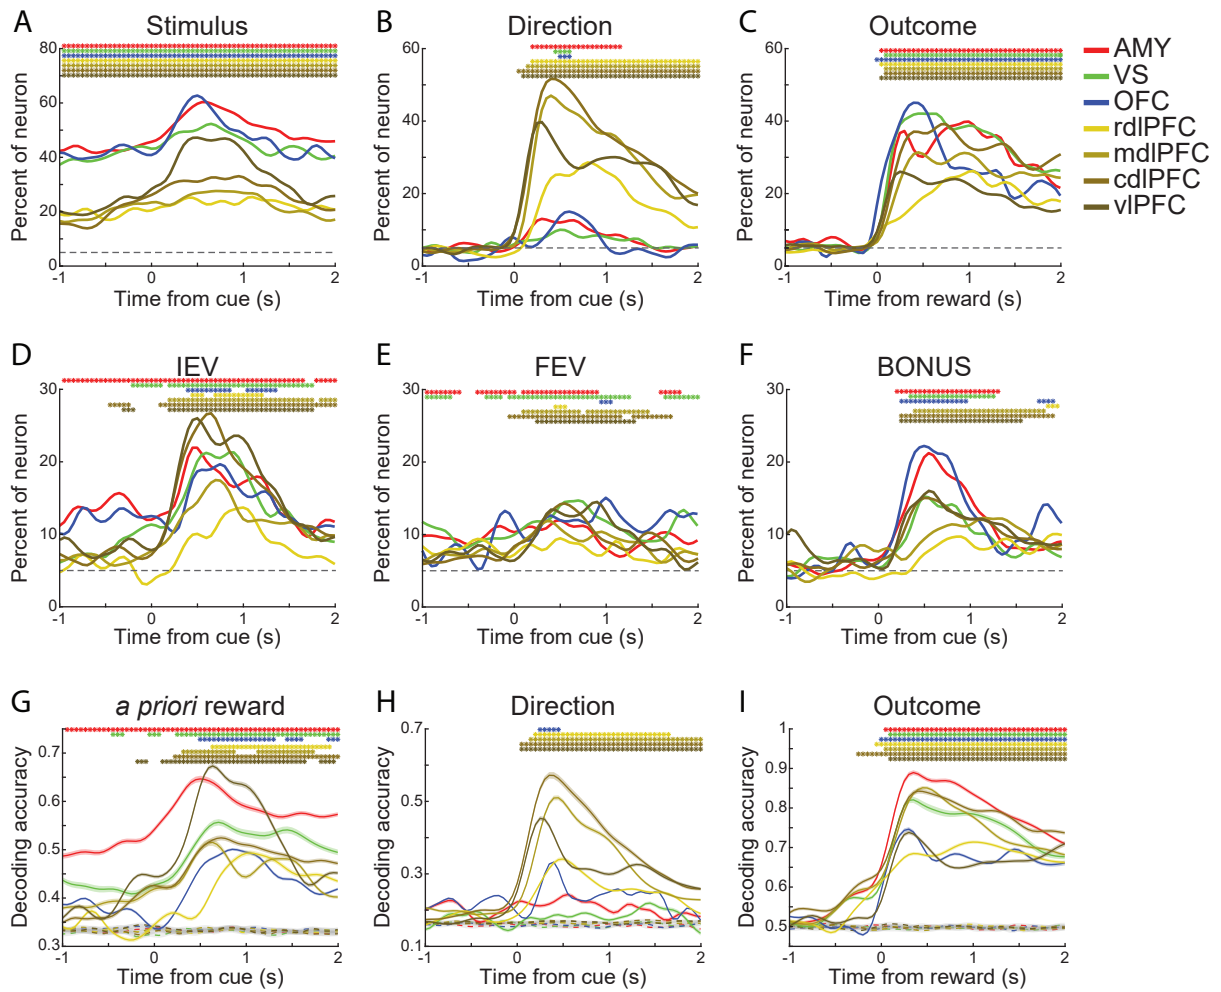

**Figure S4. Population coding of chosen stimulus, direction, outcome, and POMDP derived value signals, using only one session of PFC data from each monkey. Related to Figures 4-6.**

(A-F) Percentage of responsive neurons in each area encoding the Stimulus (A), Direction (B) of the chosen option, and the Outcome on the current trial (C), IEV (D), FEV (E) and BONUS (F) of the chosen options. Conventions are the same as Figure 4.

(G-I) The time course of mean decoding accuracy of *a priori* assigned reward value of choices (D), the saccade Direction (E), and the Outcome on the current trial (F) using a pseudo-population of 100 neurons. Results were averaged from 100 repetitions,  $n = 100$ . Conventions are the same as Figure 6.

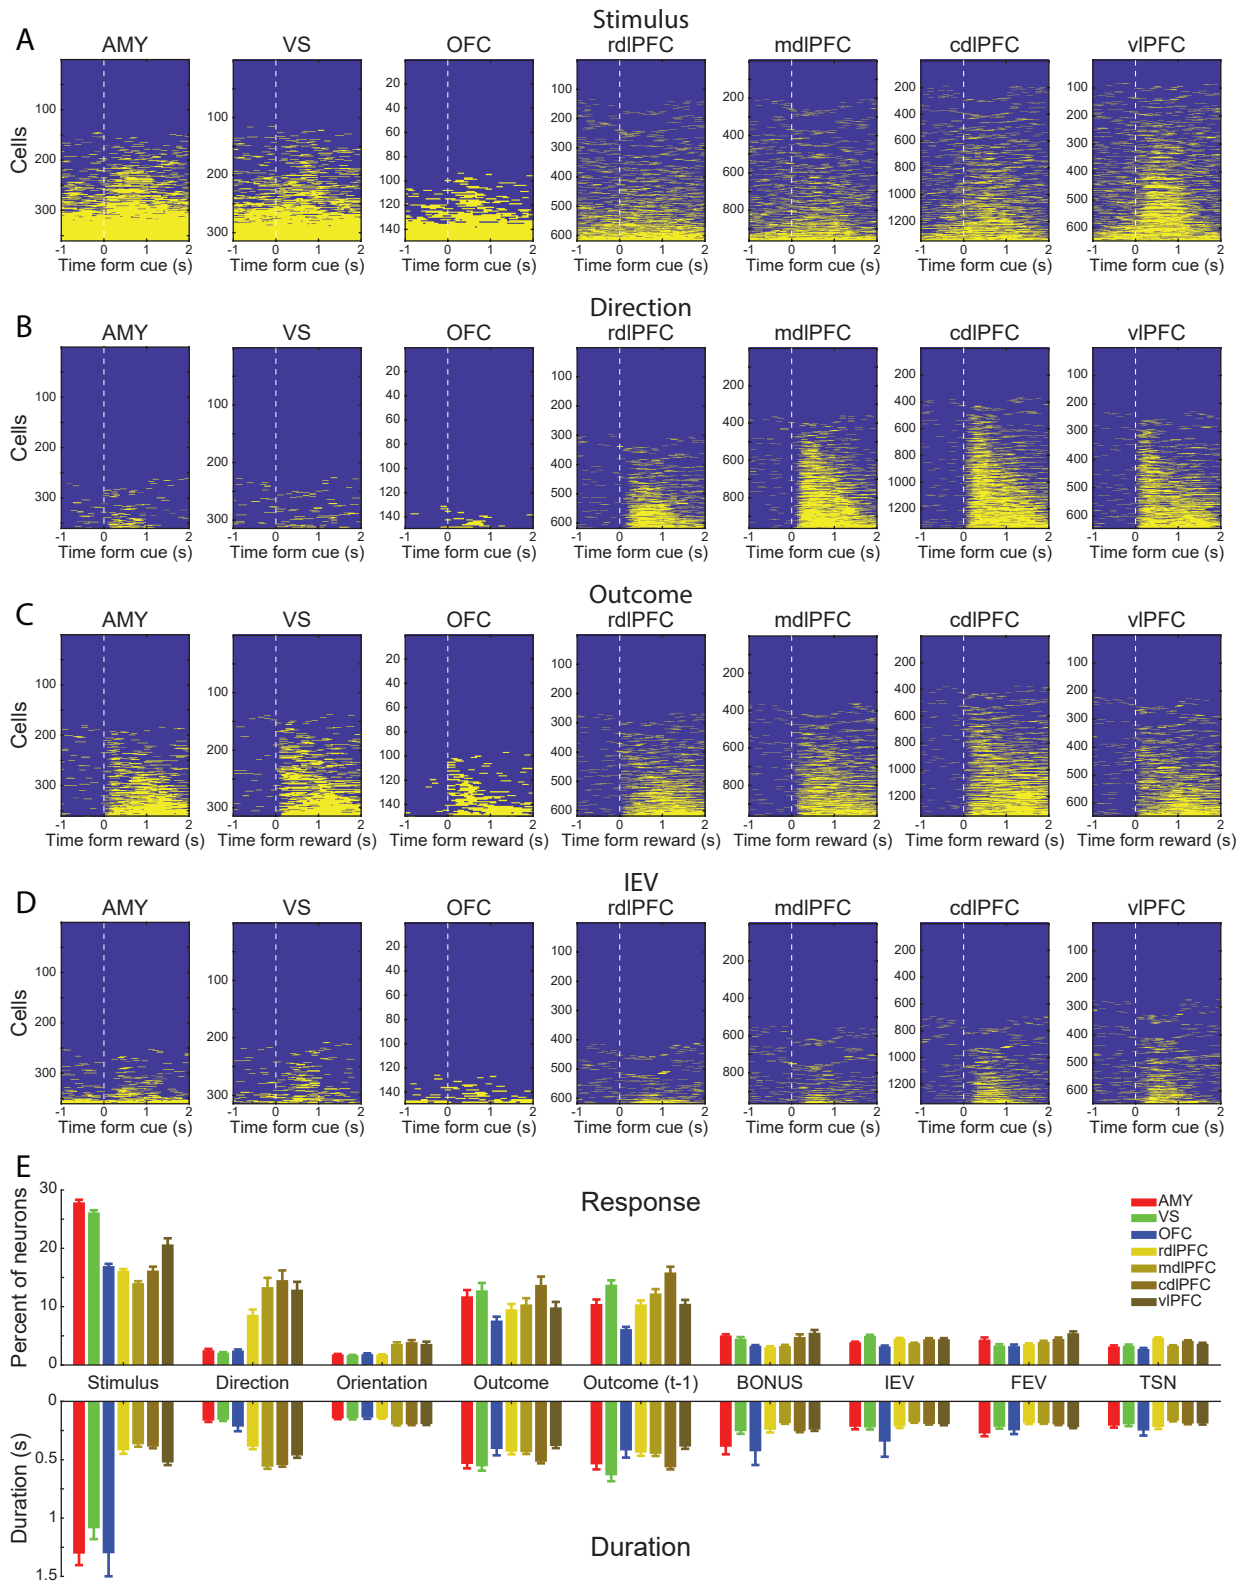

**Figure S5. Duration and strength of the representation of task factors.** *Related to Figures 4 and 5.*

(A-D) Factors represented by every single neuron, plotted along the time course of a trial. Chosen Stimulus (A), Direction (B), Outcome (C), and IEV (D) are displayed separately. Each row represents a single neuron. The yellow horizontal bars represent the responsive time zones.

(E) Mean response strength (top) and duration (bottom) of the nine factors in the amygdala, VS, OFC, and LPFC regions. Error bars represent SEM.

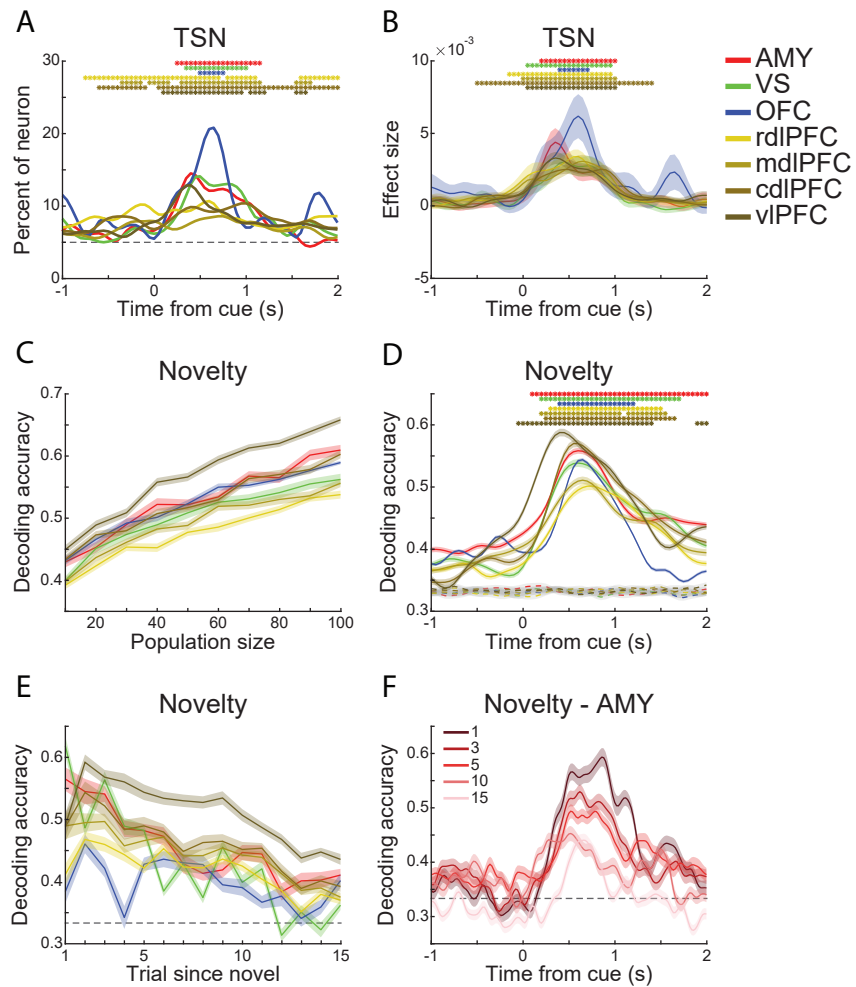

**Figure S6. Population coding and decoding of novelty choices.** Related to Figures 5-7.

(A-B) Percentage of responsive neurons (A) and their mean effect size (B) in each region for the encoding of whether the monkey had chosen the novel, best or worst alternative option. Conventions are the same as Figure 5.

(C) Decoder accuracy in predicting which option was chosen as a function of pseudo-population size for each region.

(D) Time course of mean decoding accuracy.

(E) Mean decoder performance (250 to 750 ms after stimulus onset) predicts which option was chosen as a function of the number of trials since a novel option was introduced.

(F) For the amygdala, the time course of mean decoding accuracy of chosen the novel, best or worst alternative options using the 1<sup>st</sup>, 3<sup>rd</sup>, 5<sup>th</sup>, 10<sup>th</sup>, 15<sup>th</sup> trials since introducing a novel option.

(D-F) A pseudo-population of 100 neurons was used in each condition. Conventions are the same as Figure 6.

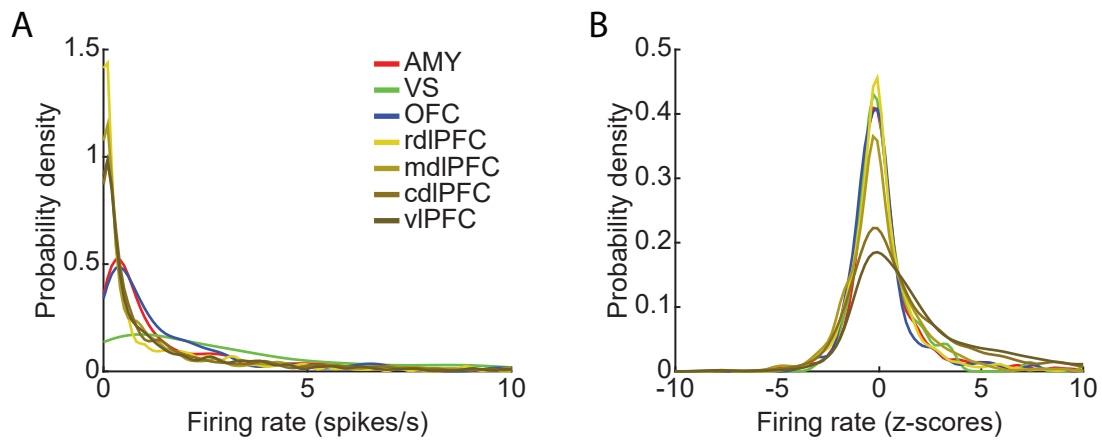

**Figure S7. Distribution of raw and z-scored firing rate of single-cell responses to choice options.** *Related to STAR Methods.*

Neuronal activities were collected from 0 to 1000 ms after stimulus onset. (A) Raw firing rate, (B) z-scored activity. The distributions are created by sorting the single-cell activities into 40 bins, then fitted with the kernel smoothing function.



## SUPPLEMENTARY TABLES

**Table S1. Number of neurons recorded by area and monkey. Related to Figure 1.**

| Monkey | Area     |                  |     |        |        |        |        |
|--------|----------|------------------|-----|--------|--------|--------|--------|
|        | Amygdala | Ventral Striatum | OFC | rdLPFC | mdLPFC | cdLPFC | cvLPFC |
| F      | 59       | 60               | 47  | -      | -      | -      | -      |
| H      | 208      | 177              | 14  | -      | -      | -      | -      |
| N      | 93       | 77               | 88  | -      | -      | -      | -      |
| V      | -        | -                | -   | 208    | 412    | 564    | 473    |
| W      | -        | -                | -   | 427    | 568    | 811    | 192    |
| Total  | 360      | 314              | 149 | 635    | 980    | 1375   | 665    |

**Table S2. Chi-square test for the percentage of neurons encoding stimulus, direction, outcome, and values. Related to Figures 4 and 5.**

| Area 1 | Area 2 | df | samples | Stimulus       |         | Direction      |         | Outcome        |         | IEV            |       | FEV            |       | BONUS          |         |
|--------|--------|----|---------|----------------|---------|----------------|---------|----------------|---------|----------------|-------|----------------|-------|----------------|---------|
|        |        |    |         | X <sup>2</sup> | p       | X <sup>2</sup> | p       | X <sup>2</sup> | p       | X <sup>2</sup> | p     | X <sup>2</sup> | p     | X <sup>2</sup> | p       |
| AMY    | VS     | 1  | 674     | 0.27           | 0.603   | 1.87           | 0.171   | 2.67           | 0.102   | 2.80           | 0.095 | 0.20           | 0.657 | 2.48           | 0.116   |
| AMY    | OFC    | 1  | 509     | 0.07           | 0.788   | 0.00           | 0.979   | 0.66           | 0.418   | 0.01           | 0.909 | 0.09           | 0.764 | 0.17           | 0.684   |
| AMY    | rdIPFC | 1  | 995     | 36.48          | < 0.001 | 16.80          | < 0.001 | 11.44          | 0.001   | 8.61           | 0.003 | 0.62           | 0.431 | 17.43          | < 0.001 |
| AMY    | mdIPFC | 1  | 1340    | 55.23          | < 0.001 | 76.02          | < 0.001 | 1.74           | 0.187   | 11.02          | 0.001 | 1.17           | 0.279 | 12.64          | < 0.001 |
| AMY    | cdIPFC | 1  | 1735    | 61.84          | < 0.001 | 102.15         | < 0.001 | 0.44           | 0.507   | 10.56          | 0.001 | 0.29           | 0.593 | 4.88           | 0.027   |
| AMY    | vlPFC  | 1  | 1025    | 33.38          | < 0.001 | 42.80          | < 0.001 | 7.00           | 0.008   | 4.98           | 0.026 | 0.24           | 0.628 | 1.04           | 0.308   |
| VS     | OFC    | 1  | 463     | 0.01           | 0.940   | 0.85           | 0.357   | 0.08           | 0.778   | 1.10           | 0.294 | 0.00           | 1.000 | 2.29           | 0.130   |
| VS     | rdIPFC | 1  | 949     | 27.60          | < 0.001 | 27.80          | < 0.001 | 28.05          | 0.000   | 0.53           | 0.468 | 1.73           | 0.189 | 4.20           | 0.040   |
| VS     | mdIPFC | 1  | 1294    | 42.61          | < 0.001 | 91.43          | < 0.001 | 11.38          | 0.001   | 0.78           | 0.377 | 2.71           | 0.100 | 1.65           | 0.199   |
| VS     | cdIPFC | 1  | 1689    | 47.41          | < 0.001 | 118.39         | < 0.001 | 2.14           | 0.144   | 0.50           | 0.478 | 1.25           | 0.264 | 0.00           | 0.996   |
| VS     | vlPFC  | 1  | 979     | 24.92          | < 0.001 | 56.58          | < 0.001 | 20.98          | < 0.001 | 0.01           | 0.938 | 1.03           | 0.309 | 0.79           | 0.373   |
| OFC    | rdIPFC | 1  | 784     | 11.48          | 0.001   | 5.44           | 0.020   | 8.93           | 0.003   | 2.85           | 0.092 | 0.66           | 0.416 | 10.35          | 0.001   |
| OFC    | mdIPFC | 1  | 1129    | 16.50          | < 0.001 | 23.43          | < 0.001 | 2.76           | 0.097   | 3.32           | 0.069 | 0.97           | 0.326 | 7.02           | 0.008   |
| OFC    | cdIPFC | 1  | 1524    | 17.37          | < 0.001 | 30.78          | < 0.001 | 0.27           | 0.604   | 2.91           | 0.088 | 0.42           | 0.519 | 3.07           | 0.080   |
| OFC    | vlPFC  | 1  | 814     | 10.25          | 0.001   | 13.61          | < 0.001 | 6.27           | 0.012   | 1.49           | 0.222 | 0.39           | 0.534 | 1.13           | 0.287   |
| rdIPFC | mdIPFC | 1  | 1615    | 1.23           | 0.268   | 46.64          | < 0.001 | 8.74           | 0.003   | 0.02           | 0.881 | 0.10           | 0.753 | 1.34           | 0.247   |
| rdIPFC | cdIPFC | 1  | 2010    | 1.57           | 0.210   | 80.19          | < 0.001 | 33.87          | < 0.001 | 0.01           | 0.904 | 0.20           | 0.655 | 8.80           | 0.003   |
| rdIPFC | vlPFC  | 1  | 1300    | 0.13           | 0.716   | 12.81          | < 0.001 | 0.91           | 0.339   | 0.74           | 0.389 | 0.15           | 0.694 | 14.83          | < 0.001 |
| mdIPFC | cdIPFC | 1  | 2355    | 0.01           | 0.936   | 4.43           | 0.035   | 10.54          | 0.001   | 0.10           | 0.748 | 0.81           | 0.369 | 4.46           | 0.035   |
| mdIPFC | vlPFC  | 1  | 1645    | 2.32           | 0.128   | 9.62           | 0.002   | 3.84           | 0.050   | 1.24           | 0.265 | 0.58           | 0.448 | 10.13          | 0.001   |
| cdIPFC | vlPFC  | 1  | 2040    | 2.89           | 0.089   | 26.40          | < 0.001 | 23.60          | < 0.001 | 0.82           | 0.366 | 0.00           | 0.994 | 2.18           | 0.140   |

**Table S3. Number of responsive neurons recorded in each area by factor.** *Related to Figures 4 and 5.*

| Factor        | amygdala | VS  | OFC | rdlPFC | mdlPFC | cdlPFC | vlPFC |
|---------------|----------|-----|-----|--------|--------|--------|-------|
| Stimulus      | 173      | 162 | 52  | 292    | 454    | 769    | 439   |
| Direction     | 56       | 33  | 12  | 233    | 525    | 867    | 350   |
| Orientation   | 31       | 29  | 11  | 76     | 241    | 397    | 194   |
| Outcome       | 144      | 146 | 48  | 251    | 452    | 783    | 312   |
| Outcome (t-1) | 104      | 105 | 24  | 201    | 349    | 602    | 242   |
| TSN           | 57       | 56  | 16  | 115    | 149    | 273    | 148   |
| IEV           | 63       | 71  | 17  | 82     | 195    | 393    | 229   |
| FEV           | 57       | 69  | 13  | 108    | 177    | 346    | 154   |
| BONUS         | 78       | 57  | 26  | 121    | 198    | 362    | 200   |
| Intersection* | 210      | 206 | 62  | 507    | 816    | 1220   | 586   |

\* The number of neurons responding to at least one factor.

**Table S4. The frequency of chosen options across two consecutive trials, grouped by *a priori* reward probability. Related to Figure 7.**

| Switch rate (%)          |        | Current chosen Stimulus |        |       |
|--------------------------|--------|-------------------------|--------|-------|
|                          |        | Best                    | Medium | Worst |
| Previous chosen Stimulus | Best   | 18.67                   | 11.36  | 10.79 |
|                          | Medium | 11.44                   | 10.47  | 8.73  |
|                          | Worst  | 10.66                   | 8.88   | 9.01  |
